# Supplementary material for: Density of human bone marrow stromal cells regulates commitment to vascular lineages
Source: PubMed Central journal article supplement (PMC3223522; doi:10.1016/j.scr.2011.02.001), 2011-05

Figure S1

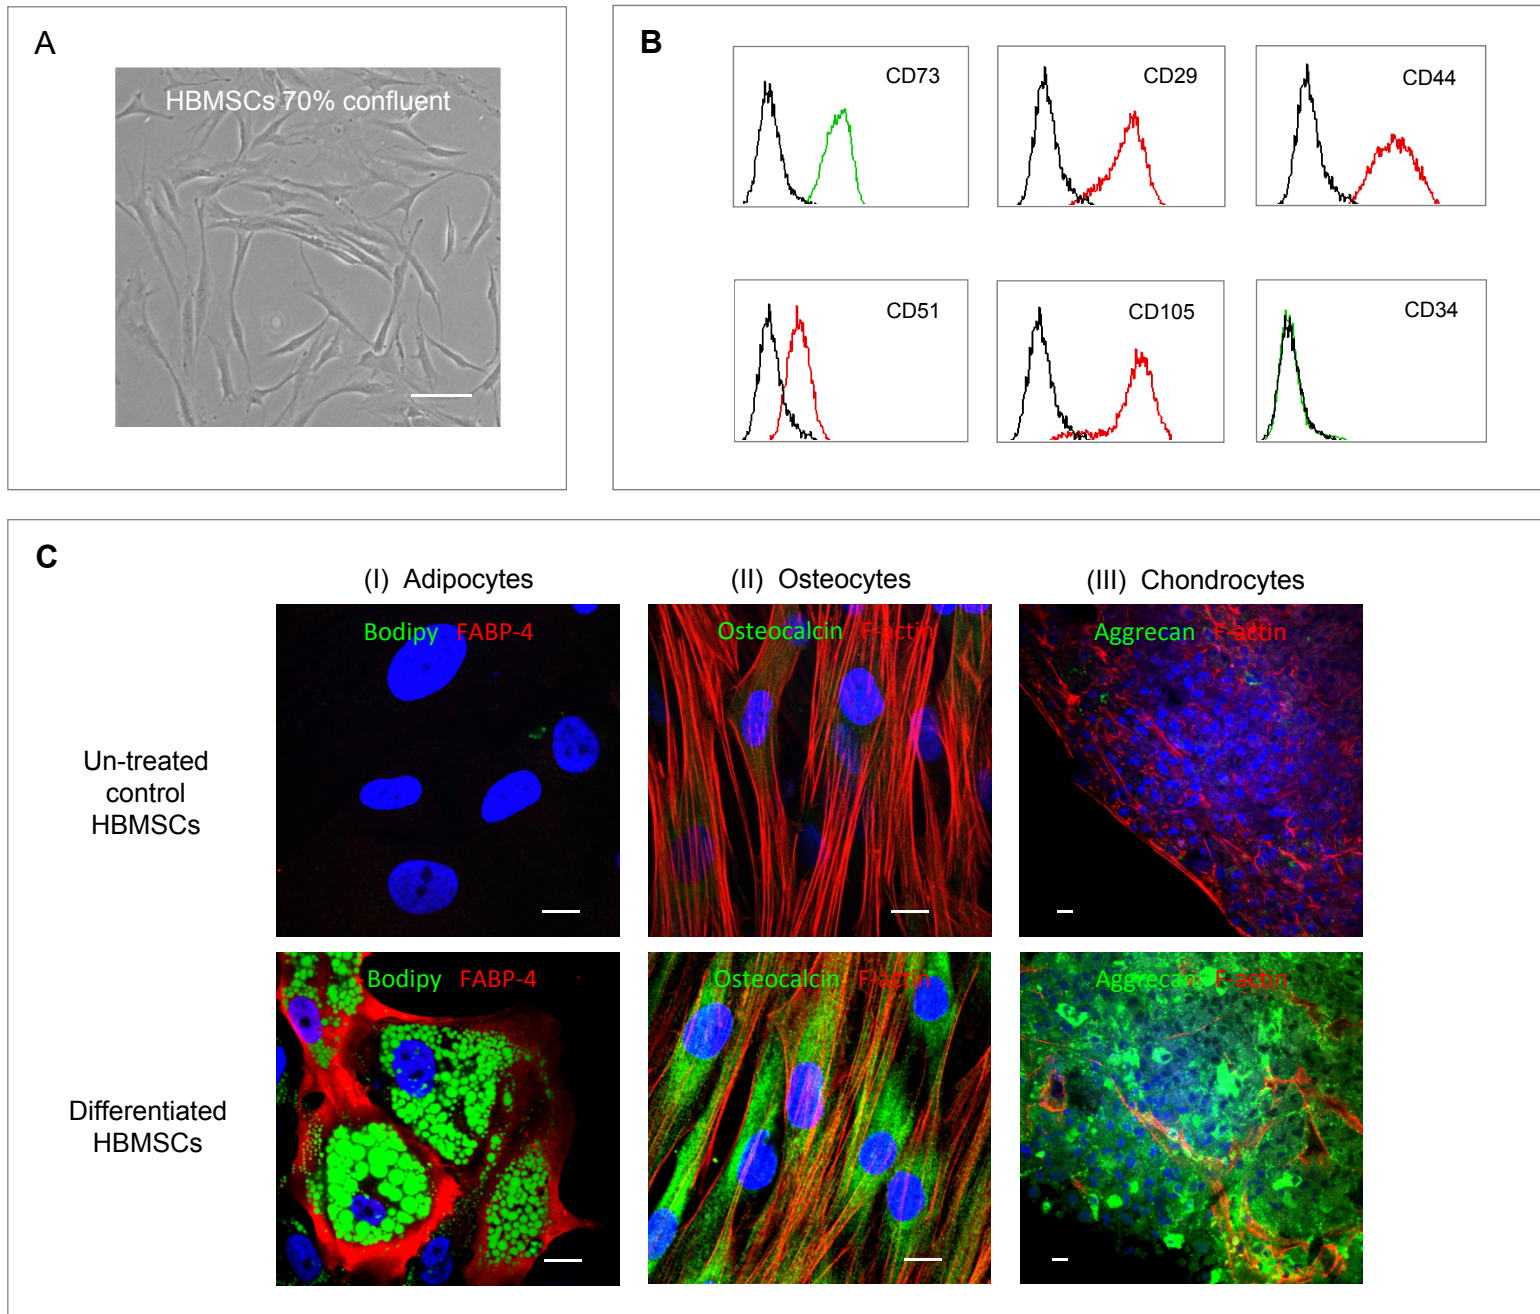

Figure S2

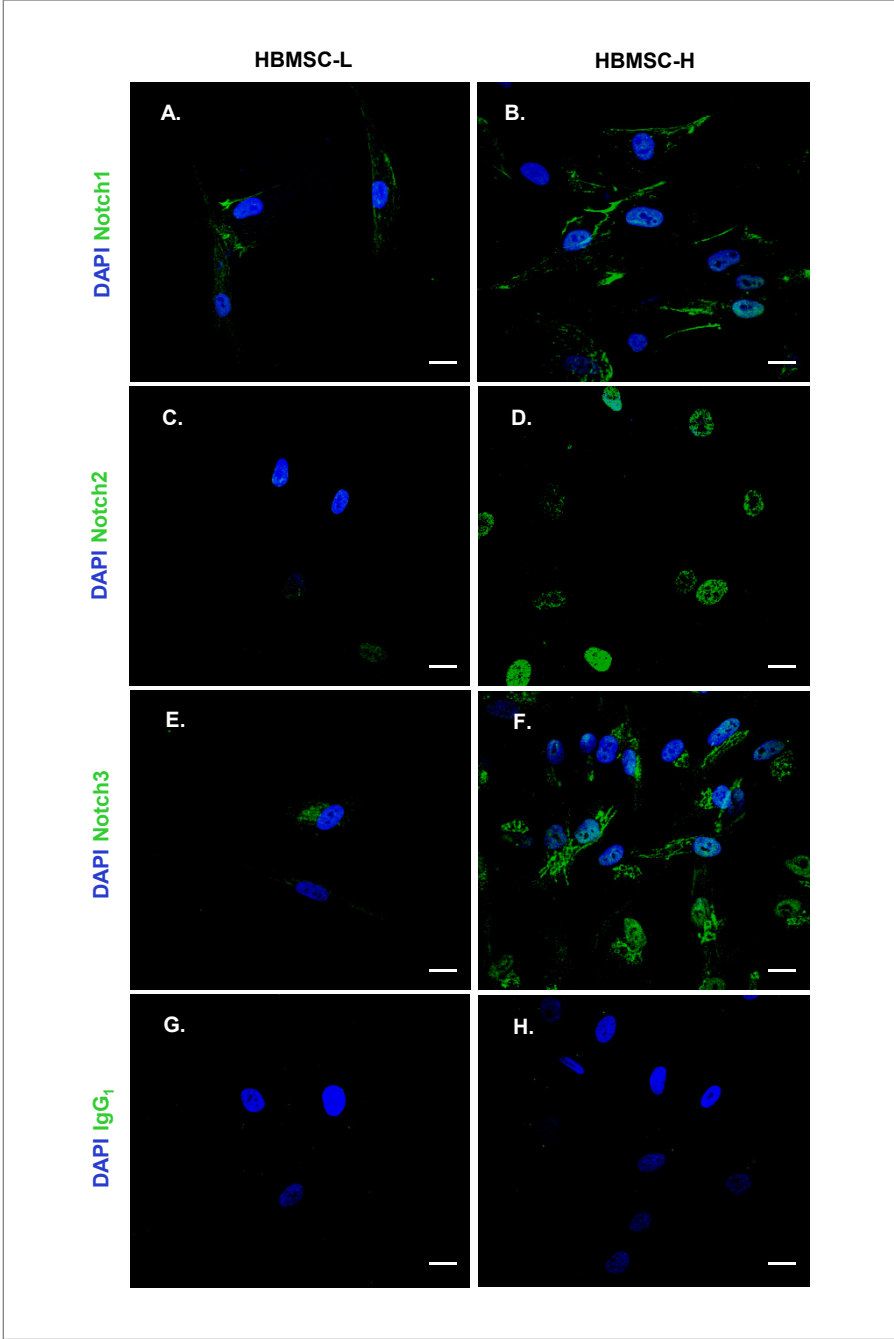

Figure S3

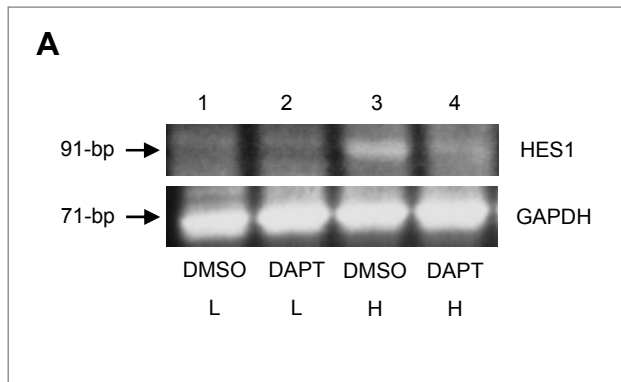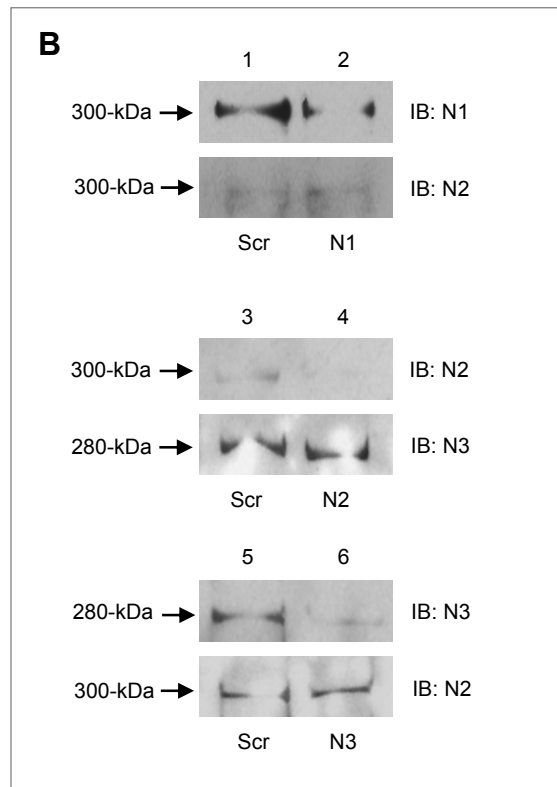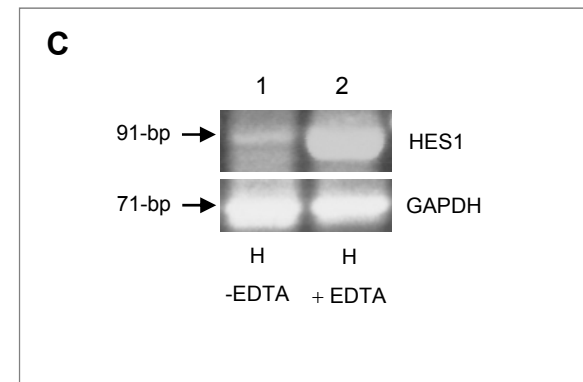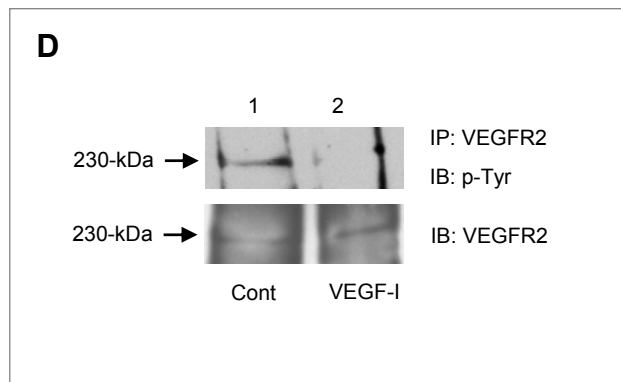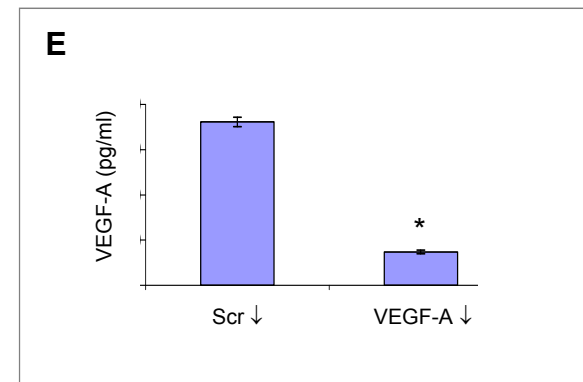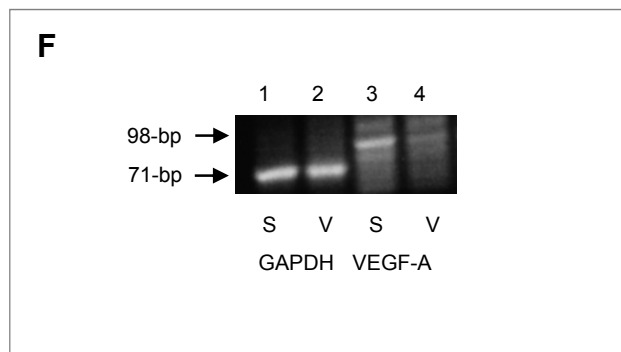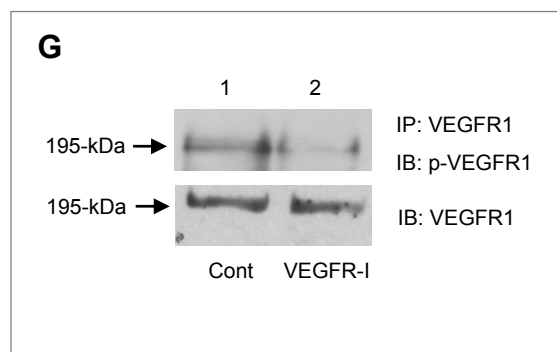

Figure S4

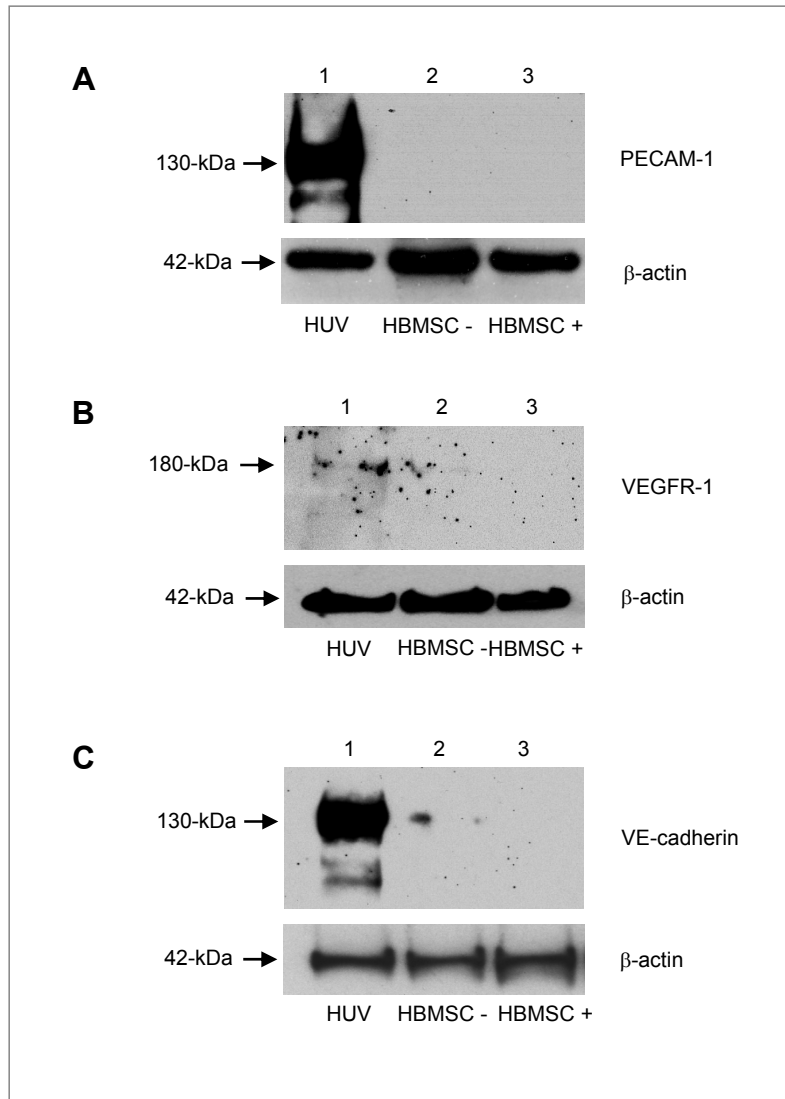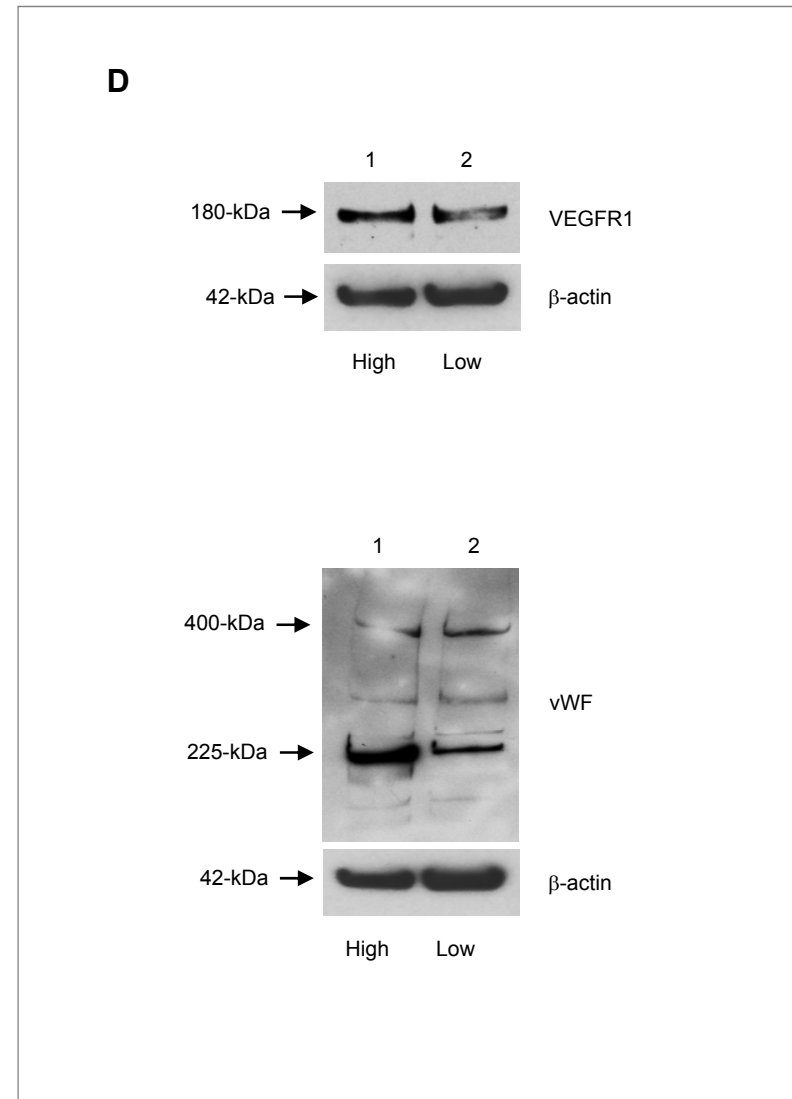

Figure S5

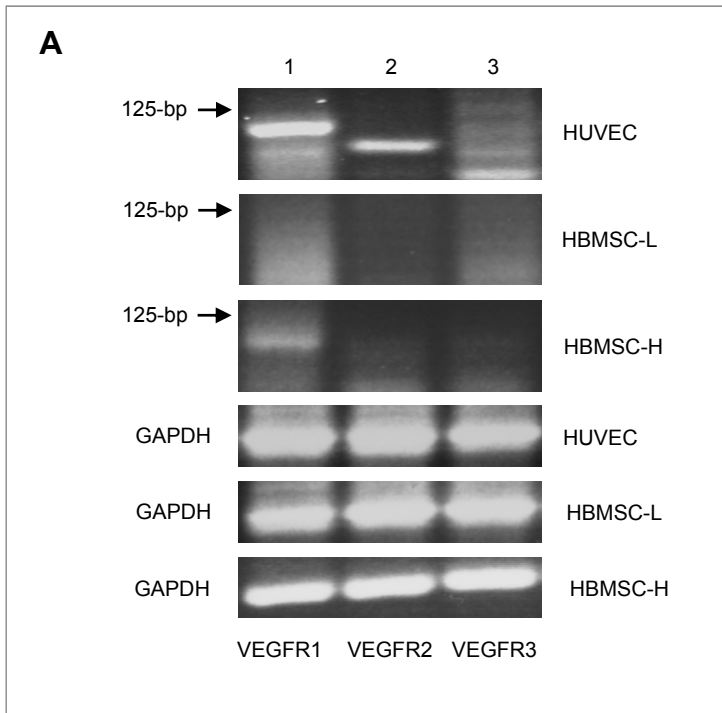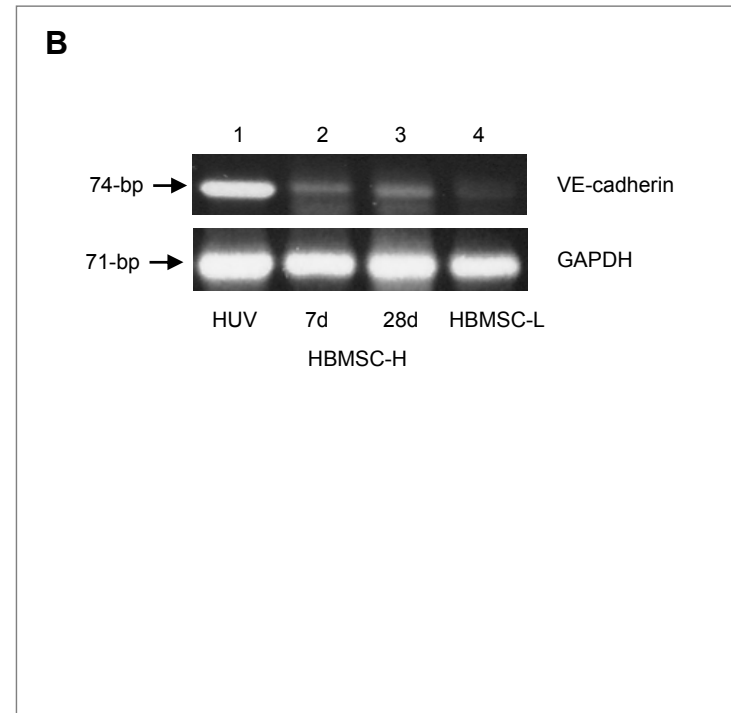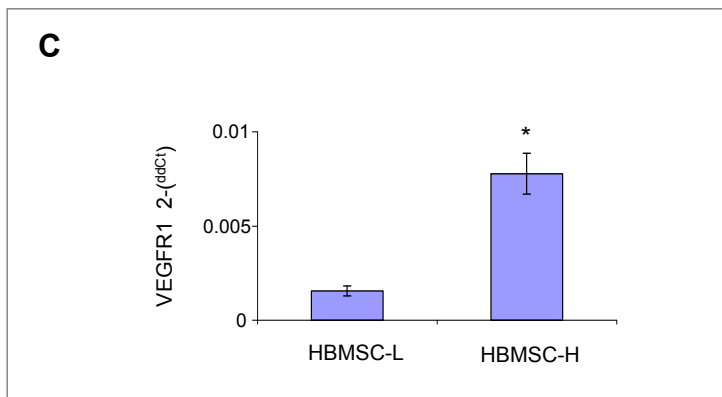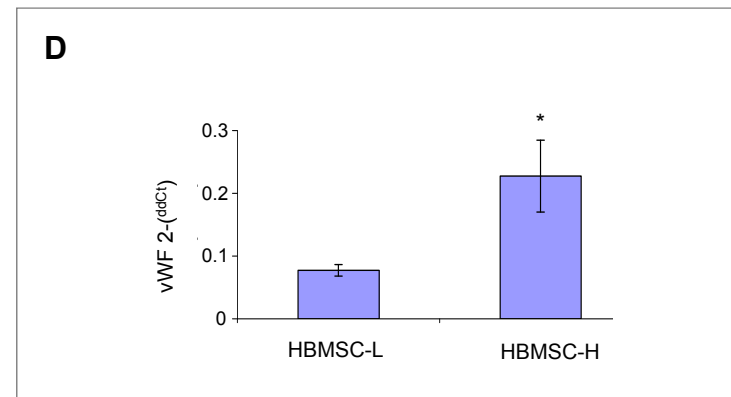

Supplement: mmc1.pdf [file mmc1.pdf]
